# Supplementary material
Source: publisher site journal article supplement (https://www.spandidos-publications.com/1281/downloadSupplementary)

Figure S1. Etanercept attenuates caerulein-induced ROS production. (A) Caerulein (10 nmol/l) induced ROS accumulation in H19-7/IGF-IR cells treated with 0  $\mu$ mol/ml etanercept by flow cytometry (n=3). (B) Caerulein (10 nmol/l) induced ROS accumulation in H19-7/IGF-IR cells treated with 1  $\mu$ mol/ml etanercept by flow cytometry (n=3). (C) Caerulein (10 nmol/l) induced ROS accumulation in H19-7/IGF-IR cells treated with 10  $\mu$ mol/ml etanercept by flow cytometry (n=3). (D) Caerulein (10 nmol/l) induced ROS accumulation in H19-7/IGF-IR cells treated with 100  $\mu$ mol/ml etanercept by flow cytometry (n=3). (E) Etanercept dose-dependently decreased caerulein-induced ROS accumulation (n=3). \* $P$ <0.05 vs. group without etanercept. ROS, reactive oxygen species; EP, etanercept.

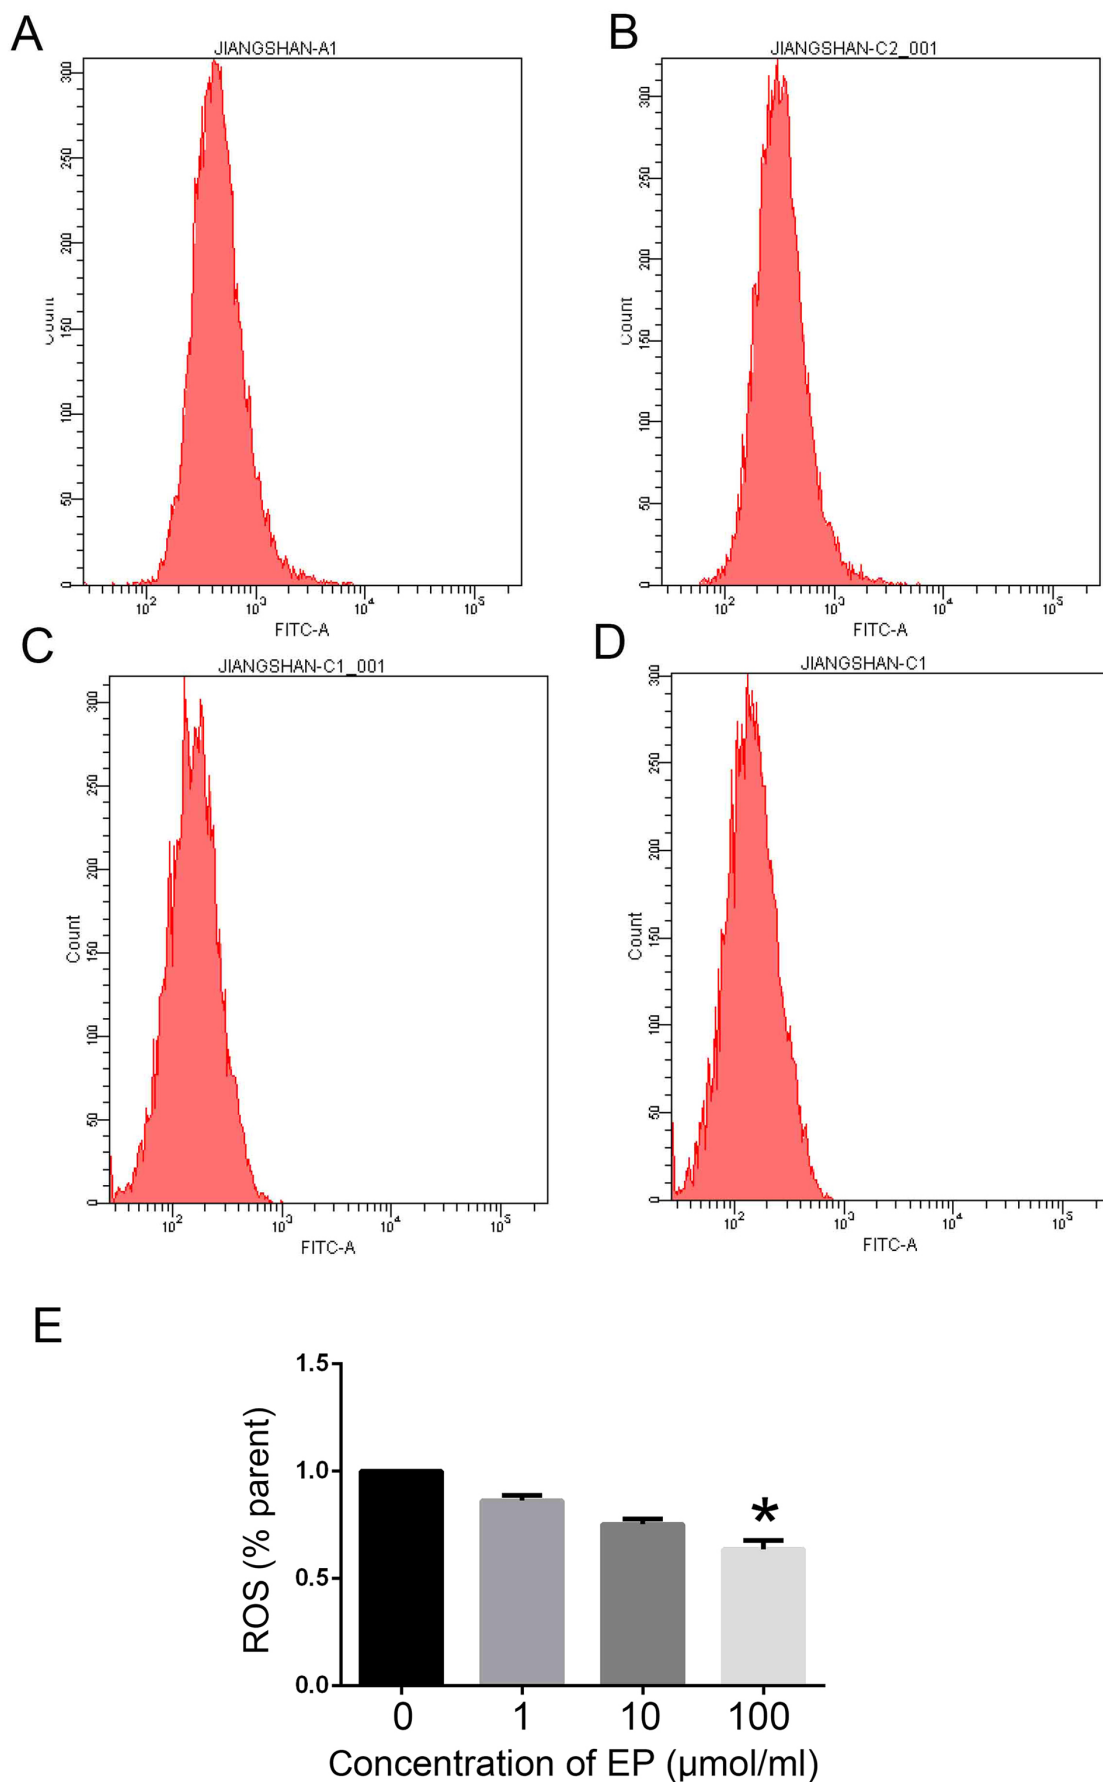

Supplement: Supplementary file 1 [file downloadSupplementary]
